# Supplementary material
Source: MDPI journal article supplement (https://www.mdpi.com/2077-1312/11/3/522)
Supplement: s1 [file s1]

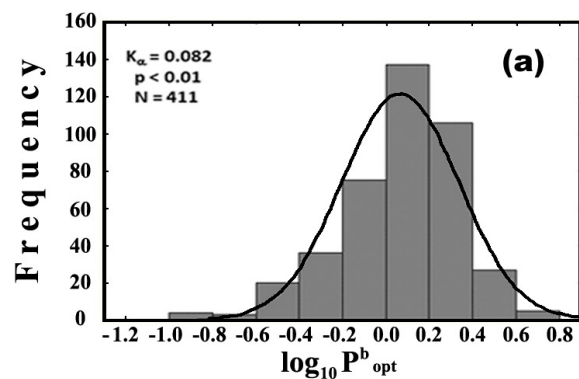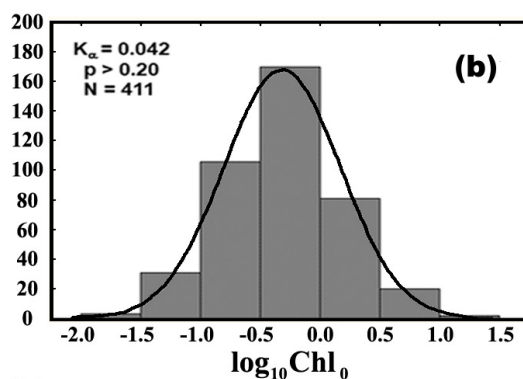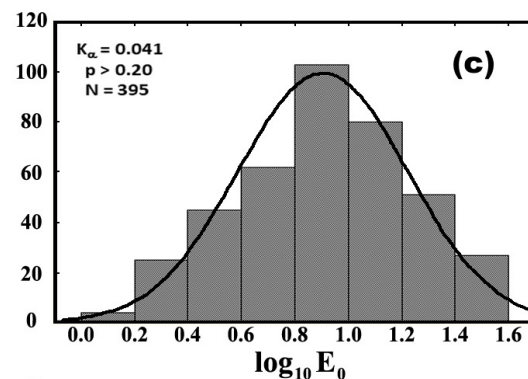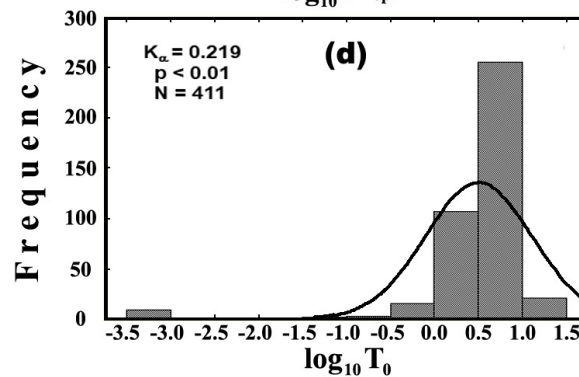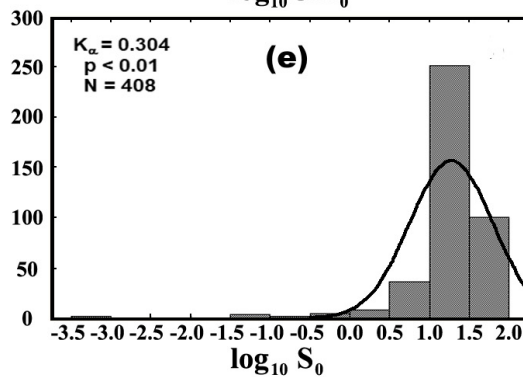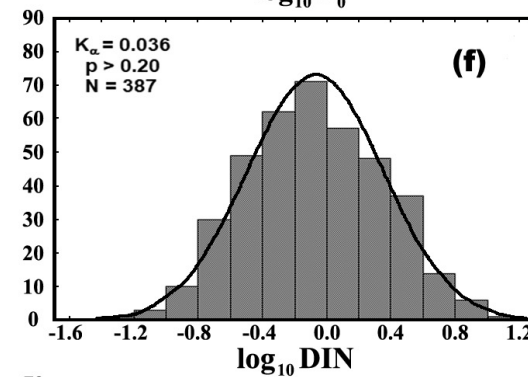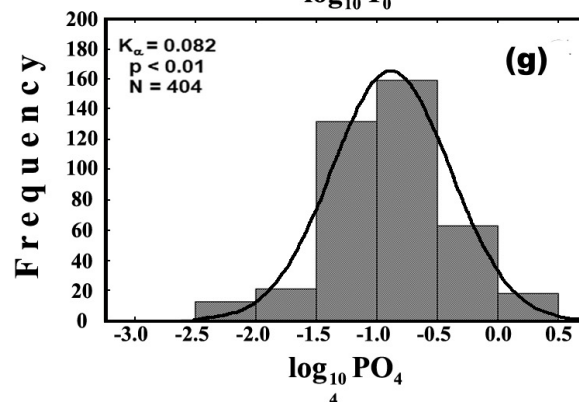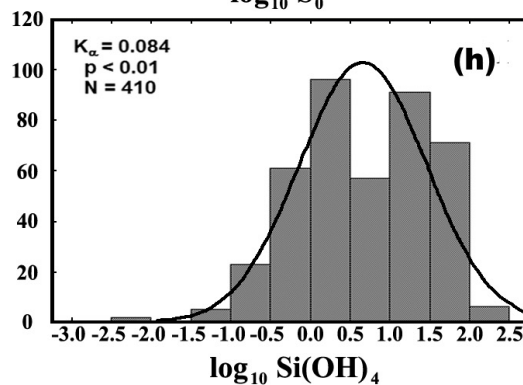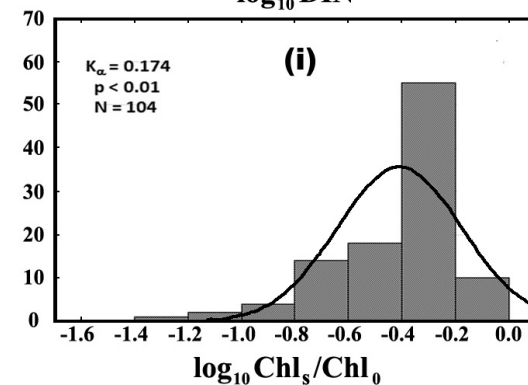

**Figure S1.** Frequency distribution of log-transformed values of biotic and abiotic variables. (a) – optimal assimilation number ( $P^b_{opt}$ ); (b) – surface chlorophyll *a* concentration ( $Chl_0$ ); (c) – subsurface photosynthetically available radiation (PAR) ( $E_0$ ); (d) – sea surface temperature ( $T_0$ ); (e) – sea surface salinity ( $S_0$ ); (f) – concentration of dissolved inorganic nitrogen (DIN); (g) – concentration of phosphates ( $PO_4$ ); (h) – concentration of dissolved silicon ( $Si(OH)_4$ ); (i) – the ratio of chlorophyll *a* concentration of small ( $< 3 \mu m$ ) to total surface phytoplankton ( $Chl_s/Chl_0$ );  $K_\alpha$  – value of Kolmogorov-Smirnov test;  $p$  value – statistical reliability;  $N$  – number of data. Solid line is the curve of expected normal distribution.
